# Supplementary material for: Effect of a Paraprofessional Home-Visiting Intervention on American Indian Teen Mothers’ and Infants’ Behavioral Risks: A Randomized Controlled Trial
Source: Atypon-hosted journal article supplement (doi:10.1176/appi.ajp.2012.12010121), 2013-01-01
Supplement: 83_ds001.pdf [file 83_ds001.pdf]

**FIGURE S1. Sample Flip Chart Page**

Fig. 1: Sample Flipchart Page – what participant sees.

## Identifying a Baby’s Needs

Joe and Linda just brought their baby boy home from the hospital. He was sleeping peacefully for a few hours and now he is awake and crying. What should they do? Put the following steps in order from first to last and describe why you chose that order.

See if he is cold and needs to be warmed up.

See if he needs to be comforted/consoled by you.

See if he is hungry and feed him if he is

See if his diaper is soiled and change it.


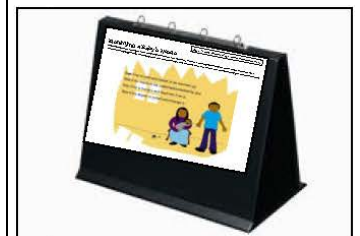

Reverse Flipchart Page – what educator sees.

Note: This illustration shows educator what participant is seeing.

## Identifying a Baby’s Needs

Joe and Linda just brought their baby boy home from the hospital. He was sleeping peacefully for a few hours and now he is awake and crying. What should they do? Put the following steps in order from first to last and describe why you chose that order.

**Teaching Point:** There are several ways to console a crying baby. It may be necessary to try several ways before knowing what works best for the baby.

- Review participant’s response.
- Review teaching point with participant.
- What are the basic things Joe and Linda should do to find out why their son is crying?
  - Check his basic needs first.
    - If he is crying because his diaper is soiled, trying to comfort him by singing probably will not work.
  - Check to see if the *diaper* is wet or soiled. Change diaper.
    - Newborn babies wet and soil their diapers often because their bladder and bowels are small.
  - Check to see if he is *hungry*. Feed.
    - Newborn babies need to eat small meals often because their stomachs are small.
    - NOTE: Newborns will often soil their diapers right after they eat. You may need to change them again after feeding and before sleep.
  - Check to see if he is *cold*. Wrap.
    - Newborn babies can get cold very quickly.
  - Then try to *console* him by trying some of the following:
    - Rock him in your arms or in a chair
    - Sing or talk to him
    - Gently stroke baby’s head or pat his chest
    - Play soft music
    - Walk with baby in your arms or in a stroller or carriage
    - Swaddle and place in safe sleeping space

•FHE Note: Participant’s family and friends may also have suggestions for other things that may help to calm the baby.

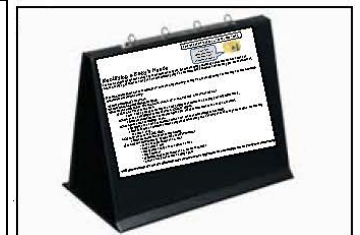

**FIGURE S2. CONSORT Diagram Depicting Flow of Participants Through Family Spirit Trial**

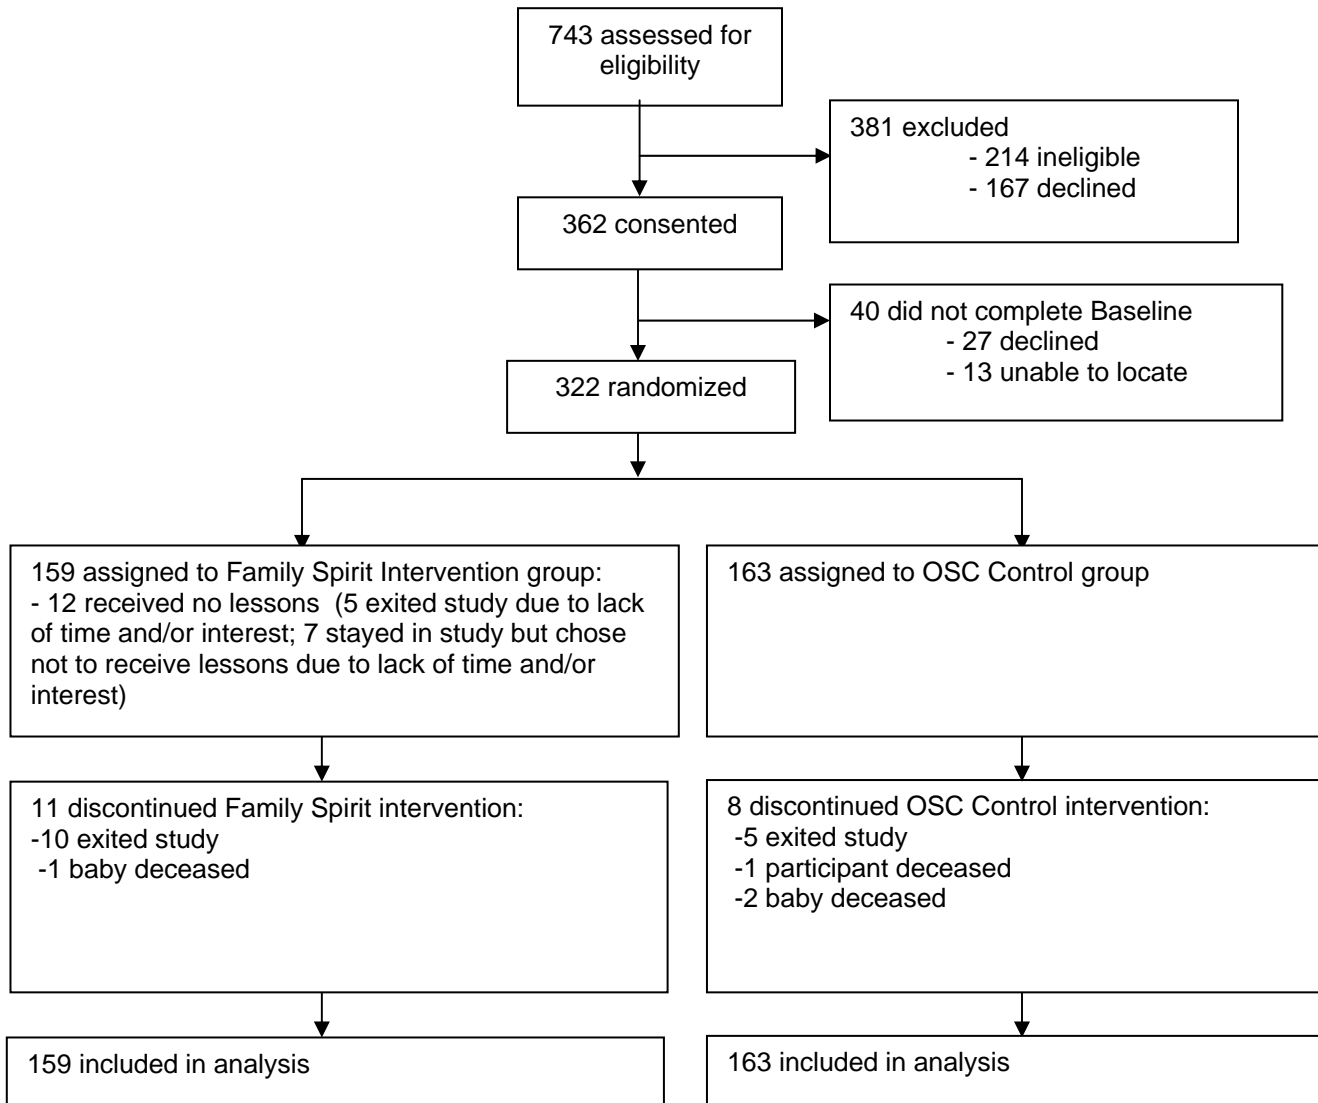

**TABLE S1. Outcome Assessment Measures Through the 12-Month Postpartum Time Point for the Family Spirit Randomized Controlled Trial**

| Aim and Measure (Reference Number)                                   | Measure Attributes          |             |                                     |                                                                                                                                                                                                                                                                                                                                     |
|----------------------------------------------------------------------|-----------------------------|-------------|-------------------------------------|-------------------------------------------------------------------------------------------------------------------------------------------------------------------------------------------------------------------------------------------------------------------------------------------------------------------------------------|
|                                                                      | Mode of Administration      | Time (mins) | Cronbach's alpha                    | Brief Description                                                                                                                                                                                                                                                                                                                   |
| <b>Aim 1: Parental competence outcomes</b>                           |                             |             |                                     |                                                                                                                                                                                                                                                                                                                                     |
| Parent Knowledge Test                                                | Self-report                 | 15          | 0.65                                | 30-item self-report multiple-choice test created by the investigator team to coincide with lessons taught in the FS curriculum and measure cumulative knowledge gains related to lesson objectives. Topics include: pregnancy labor, delivery, nutrition, breastfeeding, parenting, home safety, immunizations, and well baby care. |
| Parental Locus of Control (PLOC) Parental Self-Efficacy subscale (1) | Self-report                 | 5           | 0.67                                | One of three subscales from the PLOC used to assess parental sense of competence and efficacy in parenting tasks and roles.                                                                                                                                                                                                         |
| Home Observation for Measurement of the Environment (HOME) (2)       | Observation                 | 60          | 0.74                                | Widely utilized checklist observational measure of parental behavior, parent-child interaction, and the home environment. Consists of 45-items that span six sub-scales: Maternal Responsivity, Acceptance, Learning Materials, Variety (life experiences), Maternal Involvement, and Organization of the Home.                     |
| Home Safety Assessment (3)                                           | Observation/<br>self-report | 30          | 0.57 (for attitudinal component)    | Includes 8 self-report items regarding attitudes towards home safety for children and approximately 40 observational measures regarding home safety practices (e.g., use of electrical plug covers).                                                                                                                                |
| <b>Aim 2: Child psychosocial and behavioral outcomes</b>             |                             |             |                                     |                                                                                                                                                                                                                                                                                                                                     |
| Infant Toddler Social Emotional Assessment (ITSEA) (4)               | In-person interview         | 20          | Range from 0.63-0.81 across domains | 126 item instrument administered to parents/primary caregivers that assesses four primary domains of behavior for children ages 12-36 months including: Externalizing, Internalizing, Dysregulation, and Competence.                                                                                                                |

*(Continued)*

(Table S1, Continued)

| Aim and Measure                                                              | Measure Attributes     |             |                                    |                                                                                                                                                                                                                                                                               |
|------------------------------------------------------------------------------|------------------------|-------------|------------------------------------|-------------------------------------------------------------------------------------------------------------------------------------------------------------------------------------------------------------------------------------------------------------------------------|
|                                                                              | Mode of Administration | Time (mins) | Cronbach's alpha                   | Brief Description                                                                                                                                                                                                                                                             |
| <b>Aim 3: Maternal psychosocial and behavioral outcomes</b>                  |                        |             |                                    |                                                                                                                                                                                                                                                                               |
| Center for Epidemiological Studies – Depression (CES-D) (5)                  | Self-report            | 5           | 0.88                               | Widely used 20-item scale of depressive symptoms.                                                                                                                                                                                                                             |
| Achenback System Empirically Based Assessment: Youth Self Report (ASEBA) (6) | Self-report            | 15          | Range from 0.69-0.79 across scales | 112 items assess a broad range of behavior problems and social and academic competence over 8 subscales. Among the most extensively used and tested rating scales available.                                                                                                  |
| Problem Oriented Screening Instrument for Teens (POSIT) (7)                  | Self-report            | 10          | Range from 0.60-0.83 across scales | 139 items assess a broad range of functional areas among teens over 6 subscales, including: substance use, physical health, general mental health, family relationships, peer relationships and aggressive behavior/delinquency.                                              |
| Voices of Indian Teens (VOIT): Alcohol (8)                                   | Self-report            | 10          | 0.70                               | 92 items drawn from the alcohol scale of the Voices of Indian Teens Survey. Topics include: quantity, frequency and qualitative aspects of alcohol use; age of first use; family history of alcohol abuse; community, peer, and personal attitudes and beliefs about alcohol. |
| Voices of Indian Teens (VOIT): Drugs, Ideas, Thoughts & Happenings (8)       | Self-report            | 5           | 0.70                               | 13 items drawn from the drug use scale of the Voices of Indian Teens Survey. Topics include: quantity and frequency of drug use; types of drugs used; and age of first use                                                                                                    |

## REFERENCES

1. Campis LK, Lyman RD, Prentice-Dunn S: The parental locus of control scale: development and validation. *J Clin Child Psychol* 1986; 15:260-267
2. Caldwell BM, Bradley RH: HOME Inventory Administration Manual. Little Rock, University of Arkansas for Medical Sciences and University of Arkansas at Little Rock, 1979
3. Massachusetts Department of Health: Safe State, Safe Home. Boston, Massachusetts Department of Health, 1986
4. Carter AS, Briggs-Gowan MJ: The Infant-Toddler Social and Emotional Assessment (ITSEA) Manual. New Haven, Conn, Yale University, Department of Psychology, 1999
5. Radloff LS: The CES-D scale: A self-report depression scale for research in the general population. *Applied Psychol Meas* 1977; 1:385-401
6. Achenbach TM: Achenbach System of Empirically Based Assessments. Burlington, University of Vermont, 2000
7. Rahdert E: Adolescent assessment/referral System Manual, POSIT. Rockville, Md, US Department of Health and Human Services, 1991
8. Novins DK, Mitchell CM: Factors associated with marijuana use among American Indian adolescents. *Addiction* 1998; 93:1693-1702
